# Supplementary material for: Nutritional, antioxidant and biological activity characterization of orange peel flour to produce nutraceutical gluten-free muffins
Source: Royal Society of Chemistry journal article supplement (doi:10.1039/d4fo01395f), 2024-01-01
Supplement: d4fo01395f2.pdf [file d4fo01395f2.pdf]

## SUPPLEMENTARY MATERIALS

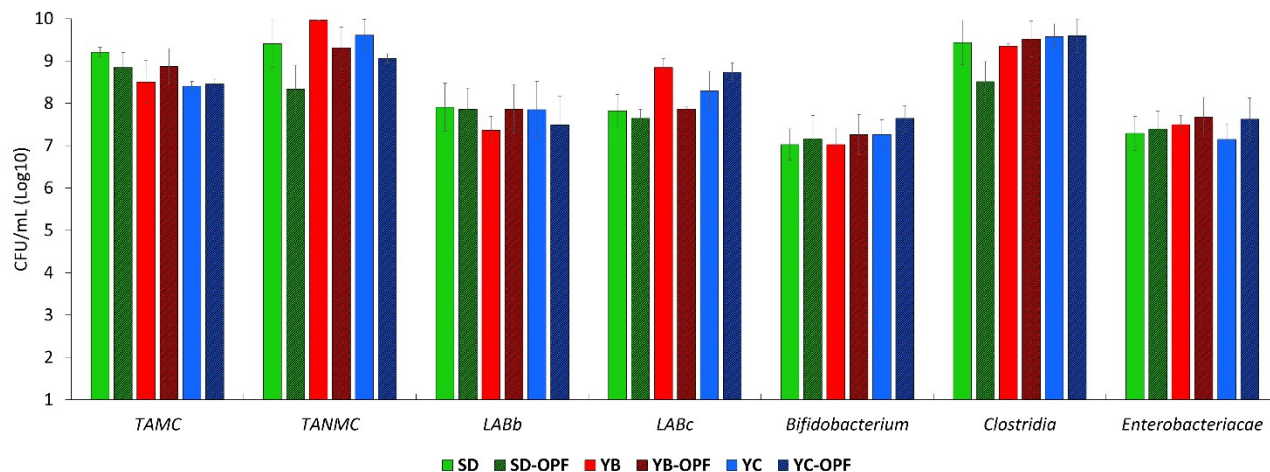

**Supplementary Figure S1:** Viable bacterial count (Log<sub>10</sub> CFU/mL ± SD) of faecal microbiota observed in batches simulating the colonic fermentation of permeate *in vitro*. Permeate solution contained the residual from the simulated digestion of muffin differing for the addition of OPF and type of fermentation (with chemical yeast, YC; baker's yeast YB; or type-II sourdough, SD). Abbreviations: TAMC, total aerobic microbial count; TANMC, total anaerobic microbial count; LABb, bacillus-shaped lactic acid bacteria; LABc, coccus-shaped lactic acid bacteria.
