# Supplementary figures and images for: Nutritional, antioxidant and biological activity characterization of orange peel flour to produce nutraceutical gluten-free muffins
Source: Royal Society of Chemistry journal article supplement (doi:10.1039/d4fo01395f), 2024-01-01

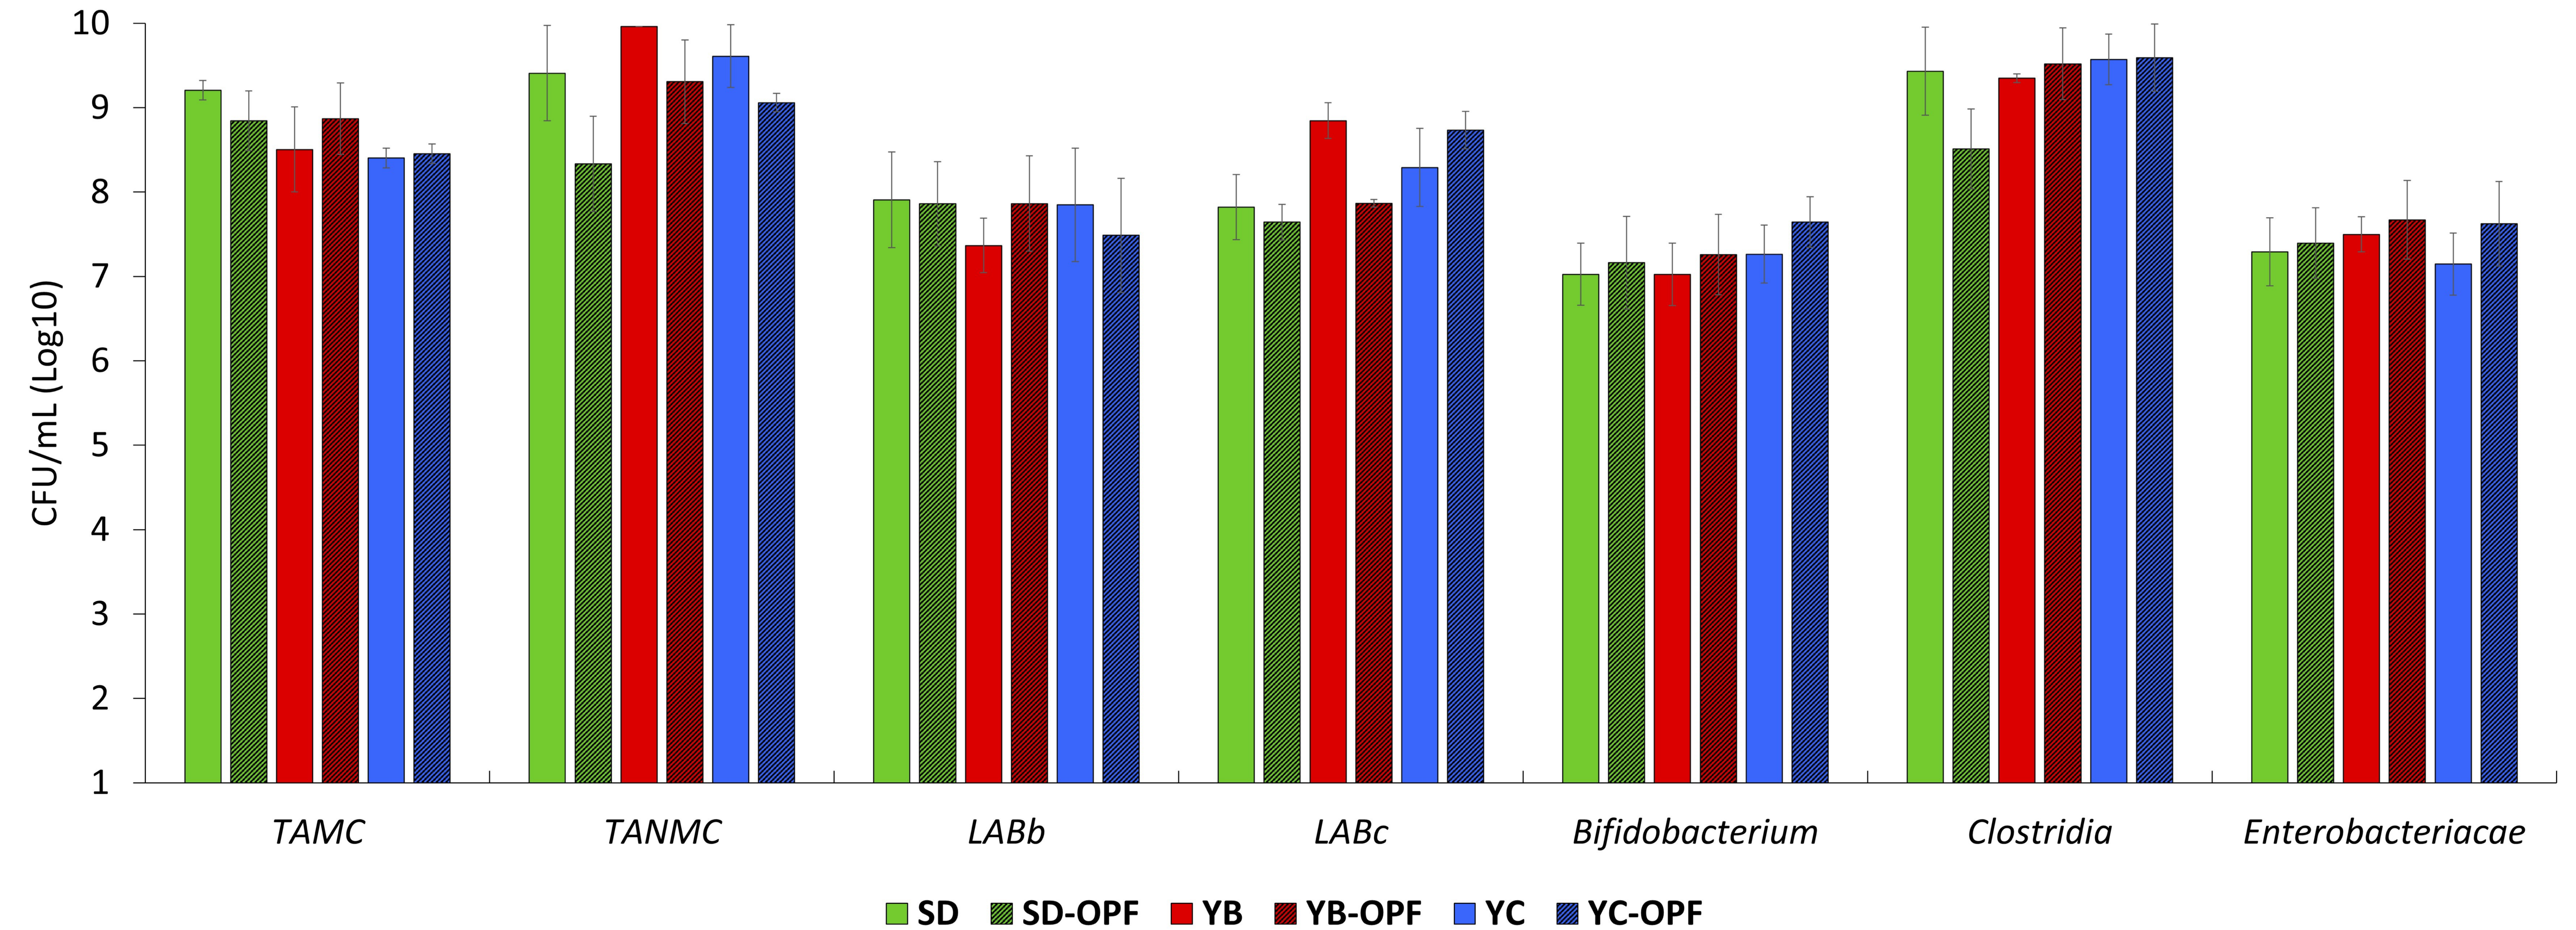

Supplement: d4fo01395f1.pdf [file d4fo01395f1.pdf]
